1 **Impact of different amino acid substitutions in penicillin-binding protein 3 on**  
2 **beta-lactam susceptibility in *Haemophilus influenzae***

3

4 Josiane Reist<sup>1,2†</sup>, Janina Linnik<sup>3,4†#</sup>, Urs Schibli<sup>5</sup>, Adrian Egli<sup>1,2††</sup> and Vladimira Hinić<sup>1††\*</sup>

5 <sup>1</sup> Division of Clinical Bacteriology and Mycology, University Hospital Basel, Basel,  
6 Switzerland

7 <sup>2</sup> Applied Microbiology Research, Department of Biomedicine, University of Basel, Basel,  
8 Switzerland

9 <sup>3</sup> Department of Biosystems Science and Engineering, ETH Zurich, Basel, Switzerland

10 <sup>4</sup> Swiss Institute for Bioinformatics, Basel, Switzerland

11 <sup>5</sup> Bakteriologisches Institut Olten, Kantonsspital Olten, Switzerland

12

13 † These first authors contributed equally to this article.

14 †† These senior authors contributed equally to this article.

15

16 # ORCID: 0000-0003-0540-2896

17

18 \*Corresponding author. Mailing address: Division of Clinical Microbiology, University Hospital  
19 Basel, Petersgraben 4, 4031 Basel, Switzerland. Phone: +41 61 2655805. Fax: +41 61 265  
20 53 55. E-mail: vladimira.hinic@usb.ch

21

22 Parts of this study were presented at the European Congress of Clinical Microbiology and  
23 Infectious Diseases (ECCMID), held in Vienna from 22 to 25 April 2017.

24

## 25 **Abstract**

26 **Purpose:** Beta-lactam antibiotics in combination with a beta-lactamase inhibitor are the first-  
27 line treatment option for *Haemophilus influenzae* infections. However, beta-lactamase-  
28 independent resistance to beta-lactams is increasing. This resistance mechanism has been  
29 linked to amino acid substitutions in the penicillin-binding protein 3 (PBP3), but how these  
30 substitutions lead to decreased binding affinities to certain beta-lactam antimicrobials  
31 remains unknown.

32 **Methods:** We investigated beta-lactam resistance and amino acid substitutions in PBP3  
33 from fifty-three clinical isolates of *H. influenzae* collected in Switzerland from January to April  
34 2016. Identification of key polymorphisms and classification of strains into PBP3 amino acid  
35 substitution groups I, II, and M was done as previously described. Based on published PBP3  
36 crystal structures, we investigated how the group-specific amino acid substitutions impact the  
37 beta-lactam binding site.

38 **Results:** We found that both group I and group II substitutions disrupt the Asn526-Arg517-  
39 Glu324 interaction, which might affect the configuration of the beta-lactam binding site.  
40 Amino acid substitutions in group M strains are distant from the active site and have most  
41 likely no impact on beta-lactam binding. In accordance with this observation, all group M  
42 strains showed minimal inhibitory concentrations (MICs) within the susceptible range for all  
43 tested antimicrobials and were not significantly different to the wild type (beta-lactamase  
44 producers excluded), while group I and group II strains showed significantly higher MICs for  
45 beta-lactam antimicrobials.

46 **Conclusion:** Group M strains are phenotypically equal to the wild type, while amino acid  
47 substitutions of group I and group II might affect the beta-lactam binding through a common  
48 mechanism by disrupting the Asn526-Arg517-Glu324 interaction.

49

50 **Keywords:** *Haemophilus influenzae*, beta-lactam antimicrobials, beta-lactam resistance,  
51 PBP3, genotype, phenotype

52

### 53 **Introduction**

54 Beta-lactam antibiotics are considered to be the first-line treatment option for  
55 *Haemophilus influenzae* infections: aminopenicillins used in combination with a beta-  
56 lactamase inhibitor for respiratory and other non-invasive infections; and third-generation  
57 cephalosporins for invasive infections such as meningitis (1). Although the percentages of  
58 beta-lactamase positive isolates in European countries are relatively low (Turkey 6.8%,  
59 Germany 9.3%, France 11.9%, Poland 17.9%) (2-5), the percentages in some Asian  
60 countries are much higher (China 31.0%, Vietnam 40.5%) (6, 7). There are two main beta-  
61 lactamase types found in *H. influenzae*: TEM-1 and ROB-1 (8). According to several studies,  
62 ROB-1 beta-lactamase is very rare and mostly found in North America, while TEM-1 type is  
63 globally distributed (8-10). These beta-lactamases confer resistance to aminopenicillins and  
64 are easily detected by using a simple nitrocefin-based beta-lactamase test.

65 However, the appearance and spreading of beta-lactamase-independent beta-lactam  
66 resistance is more worrying (11, 12). The beta-lactam resistance in these isolates is mostly  
67 due to amino acid substitutions in the *ftsI* gene which lead to alterations in penicillin-binding  
68 protein 3 (PBP3) and consequently a decreased affinity for binding of certain beta-lactam

69 antibiotics (13, 14). Based on the beta-lactamase production and presence of *ftsI* mutations,  
70 the strains can be classified into four susceptibility groups (**Table 1a**) as previously described  
71 by Ubukata et al., Dabernat et al. and García-Cobos et al. (15-17). The strains with low-level  
72 PBP3-mediated resistance such as group I and II (low-rPBP3) show ampicillin minimal  
73 inhibitory concentrations (MICs) between 0.5 and 2 mg/L, whereas strains with high-level  
74 resistance (high-rPBP3) such as group III exhibit higher ampicillin MICs between 1 and 16  
75 mg/L, often combined with reduced susceptibility to cephalosporins (11, 17-22). Although  
76 group III isolates are mainly distributed in some Asian countries such as Japan and Korea  
77 (23, 24), these more resistant strains, especially group III-like have been detected on rare  
78 occasions in some European countries (3, 14, 20, 25, 26).

79 PBP3s are transpeptidases or carboxypeptidases involved in peptidoglycan  
80 metabolism. They harbour three specific motifs: SXXK, (S/Y)XN and (K/H) (S/T)G, which  
81 define the active site of the serine penicillin-recognizing enzyme family (15, 27). The serine in  
82 the SXXK motif is crucial to the catalytic mechanism (27).

83 The aim of our study was to investigate the impact of PBP3 amino acid substitutions  
84 in clinical isolates of *H. influenzae* on (i) antimicrobial susceptibility, (ii) the beta-lactam  
85 binding site based on published PBP3 crystal structures, and (iii) to investigate, whether  
86 there is an association between antimicrobial susceptibility and the location of the substituted  
87 amino acids.

88

## 89 **Materials and methods**

### 90 **Clinical specimens and reference strains**

91 The clinical isolates of *H. influenzae* were collected prospectively from January to April 2016  
92 from in-patients of the University Hospital Basel, Switzerland. Three isolates originated from  
93 patients of the Cantonal Hospital in Olten, Switzerland. One isolate originated from the UK  
94 NEQAS external quality assessment services, Scotland. Only one sample per patient was  
95 included in the study. Thirty-four samples were obtained from respiratory samples: sputum  
96 (n=20), tracheal secretion (n=8), bronchial secretion (n=4), and bronchoalveolar lavage  
97 (n=2). Nineteen samples were collected from other body sites: conjunctiva (n=8), ear canal  
98 (n=3), cerebrospinal fluid (n=2) and others (n=6).

99

### 100 **Isolation and storage of the isolates**

101 The isolation of *H. influenzae* from clinical samples was carried out by standard protocols  
102 including Haemophilus Chocolate 2 agar (HAE2) or chocolate PolyViteX (PVX) agar  
103 (bioMérieux, Marcy-l'Étoile, France) incubated at 36 °C under the atmosphere containing 5%  
104 CO<sub>2</sub>. Colonies were identified with matrix-assisted laser desorption ionization time of flight  
105 mass spectrometry (MALDI-TOF MS; Bruker, Bremen, Germany; MBT 6903 MSP Library  
106 version). All *H. influenzae* isolates were frozen at -70 °C in cryogenic Microbank™ vials (Pro-  
107 Lab Diagnostics, Birkenhead, UK). Prior to testing, the strains were cultured on PVX agar  
108 with subculture after 24 hours.

109

### 110 **Antimicrobial susceptibility testing**

111 Minimal inhibitory concentrations (MICs) determination was performed with Etest®  
112 (bioMérieux). The following antimicrobials were tested: ampicillin, amoxicillin, amoxicillin-

113 clavulanic acid, piperacillin, piperacillin-tazobactam, cefuroxime, and meropenem. The MIC  
114 breakpoints and screening results for beta-lactam resistance with 1 U benzylpenicillin disc  
115 were interpreted as defined by the European Committee on Antimicrobial Susceptibility  
116 Testing (EUCAST, version 7.1) (28), except for piperacillin-tazobactam which was interpreted  
117 as defined by the Clinical and Laboratory Standards Institute (CLSI, 27th edition) (29) due to  
118 no existing EUCAST interpretation criteria. Piperacillin was interpreted according to CLSI  
119 guidelines for piperacillin-tazobactam, because there are no interpretation criteria in either  
120 EUCAST or CLSI guidelines for this antimicrobial.

121  
122 **Statistical analysis of MICs for comparison of strains with amino acid substitutions to**  
123 **wild type strains**

124 Wilcoxon rank-sum test was used to compare MICs between strains as follows: For all tested  
125 antimicrobials, we compared the MICs of group IIa, IIb, IIc and group M strains to the  
126 respective MICs of the wildtype. Group I strains were excluded from the analysis, because  
127 we found only two strains in this group. Since we were interested in beta-lactamase  
128 independent resistance, all beta-lactamase producing strains were excluded as well. To  
129 correct the obtained p-values for multiple hypothesis testing, we used the Benjamini-  
130 Hochberg-Yekutiely procedure that controls the false discovery rate (30). The analysis has  
131 been done in R. All analysis scripts including raw data and figure-generating scripts are  
132 available on gitlab: <https://gitlab.com/csb.ethz/haemophilus-pbp3-manuscript> (online  
133 resource **ESM1**).

134

### 135 **Phenotypic and genotypic determination of beta-lactamase production**

136 Beta-lactamase production was determined with BBL™ Cefinase™ Paper Discs (Beckton  
137 Dickinson, Franklin Lakes, NJ, USA) according to manufacturer's instructions. Presence of  
138 TEM-1 beta-lactamase encoding gene was determined by conventional PCR with primers  
139 described by Dabernat et al. (16). The following reference strains were used as controls for  
140 TEM-1 PCR: *H. influenzae* ATCC 49247 (BLNAR) and *H. influenzae* ATCC 35056 (BLPAR).

141

### 142 **Determination of *ftsI* mutations and identification of PBP3 amino acid substitution**

#### 143 **groups**

144 Nucleic acid extraction was performed with Advanced XL EZ1 (Qiagen, Hilden, Germany).  
145 The digestion step using proteinase K was performed for 10 minutes at 56 °C and 10  
146 minutes at 95 °C followed by purification with EZ1 Tissue card according to the  
147 manufacturer's protocol. DNA extracts were eluted in 100 µl elution buffer. Amplification of  
148 *ftsI* gene was performed by using the conventional PCR assay described by Cerquetti et al.  
149 (31). PCR products were purified with ExoSAP-IT® (USB Corporation, Cleveland, OH, USA)  
150 purification kit. The sequencing of the PCR amplicon was performed by Microsynth AG  
151 (Balgach, Switzerland) using Sanger sequencing (sequencing primer<sup>fw</sup>: 5'-  
152 GCGGATAAAGAACGAATTGC-3' (14), sequencing primer<sup>rev</sup>: 5'-  
153 CTGGATAATTCTGTCTCAGA-3' (31)). Sequences were aligned with Lasergene SeqMan  
154 Pro (DNASTAR, Madison, WI, USA) and translated into amino acid sequences using the  
155 ExPASy translate tool (<http://web.expasy.org/translate/>). To identify amino acid substitutions,  
156 the translated amino acid sequences were aligned using Clustal Omega  
157 (<http://www.ebi.ac.uk/Tools/msa/clustalo/>) to reference strain *H. influenzae* RD KW20 (Acc.

158 No. Genbank NC\_000907). Key amino acid changes were grouped as reported previously,  
159 see **Table 1b** (15-17).

160

### 161 **Investigation of group-specific mutations in the PBP3 crystal structure**

162 At the time of this study, there were no crystal structures of PBP3 from *Haemophilus* spp. in  
163 the Worldwide Protein Data Bank (wwPDB; [www.wwpdb.org](http://www.wwpdb.org)). Therefore, we selected  
164 structures from other gram-negative rods *Escherichia coli* (PDB ID 4BJP, 2.5 Å resolution)  
165 and *Pseudomonas aeruginosa* (PDB ID 3PBR, 1.95 Å resolution) for our analysis.  
166 Fortunately, the amino acid sequences of the three conserved PBP3 domains of *E. coli* and  
167 *P. aeruginosa* are identical to those of *H. influenzae*, except for one conservative amino acid  
168 substitution in *P. aeruginosa*, where serine is replaced by threonine in the (K/H) (S/T)G motif.  
169 In addition, the root mean square deviation (RMSD) of all matched atoms in the PBP3 crystal  
170 structures from *E. coli* and *P. aeruginosa* is 1.166 Å, which stands for high structural  
171 similarity (32). We used Clustal Omega to align the PBP3 amino acid sequences and to  
172 determine the sequence identity between the different species, i.e. *H. influenzae* RD KW20  
173 (UniProt Entry P45059), *Escherichia coli* (GI:635575685), and *Pseudomonas aeruginosa*  
174 (UniProt Entry Q51504). Crystal structures of PBP3 from *E. coli* and *P. aeruginosa* were  
175 aligned with PyMOL (The PyMOL Molecular Graphics System, Version 2.0 Schrödinger,  
176 LLC). To investigate whether specific amino acid substitutions impact the meropenem  
177 binding site, we constructed three-dimensional models of amino acid substitutions in *H.*  
178 *influenzae* based on the *P. aeruginosa* crystal structure (PDB ID code 3PBR).

179



## 180 **Results**

### 181 **Identification of PBP3 amino acid substitution groups**

182 Based on the PBP3 amino acid sequence deduced from the *ftsI* gene sequence, we  
183 assigned the investigated strains (n=53) to following groups as previously described (**Table**  
184 **1b**): wild type (n=17), group I (n=2), group II (a, b and d; n=21) or group M (miscellaneous,  
185 n=13) (**Table 2**). No isolates belonging to groups IIc, III or III-like were found. Eight out of 13  
186 group M isolates with three different mutation patterns (Asp350Asn and Val547Ile; Val547Ile;  
187 Asp350Asn and Val547Ile and Asn569Ser) were described previously by Cherkaoui et al.  
188 (14, 33). The remaining substitution combinations in group M have been identified for the first  
189 time in four strains of this study (**Table 2**).

190

### 191 **MICs for beta-lactam antibiotics of different PBP3 amino acid substitution groups**

192 All determined MICs are summarized in **Table 3** and shown in **Figure 1**. All strains with  
193 amino acid substitutions in PBP3 belonging to groups I, II and M (beta-lactamase producers  
194 excluded) showed very low MICs for piperacillin and piperacillin-tazobactam (range 0.016-  
195 0.25 and <0.016-0.25 mg/l, respectively), which was not observed for any other penicillin with  
196 or without beta-lactamase inhibitor (**Table 3 and Figure S1**). For all tested antimicrobials, we  
197 compared the MICs of group IIa, IIb, IIc and group M isolates (beta-lactamase producers  
198 excluded) to the respective MICs of the wildtype. Group I isolates have been excluded due to  
199 low sample size (n=2). We found no significant difference between group M and the wild type  
200 isolates. In contrast, all group II isolates showed significantly higher MICs (p-values ranging  
201 from 0.007 to 0.016, see **Figure 1**) except for piperacillin and piperacillin-tazobactam.

202

203 In the benzylpenicillin disc screen, all wild type and group M isolates (except beta-lactamase  
204 producing strains) were categorized as beta-lactam susceptible (**Figure S2**). All group I and  
205 group II isolates were categorized as resistant in the beta-lactamase screen (zone diameter  
206  $\leq 11$ mm), except for two strains with zone diameters of 12 mm (on the breakpoint) which  
207 were categorized as susceptible.

208

### 209 **Impact of group-specific amino acid substitutions on the PBP3 crystal structure**

210 We investigated the position of the identified group-specific amino acid substitutions and their  
211 impact on the PBP3 binding site (**Figure 2**). Since there was no PBP3 crystal structure of *H.*  
212 *influenzae* available at the time of this study, we selected PBP3 crystal structures from *E. coli*  
213 and *P. aeruginosa* for our analysis, which amino acid sequences of the three conserved  
214 PBP3 domains were identical to those of *H. influenzae*, except for one conservative amino  
215 acid substitution in *P. aeruginosa*, where serine is replaced by threonine in the (K/H) (S/T)G  
216 motif. The overall PBP3 amino acid sequence identity between *H. influenzae* and *E. coli* is  
217 54%, between *H. influenzae* and *P. aeruginosa* 39%, and between *E. coli* and *P. aeruginosa*  
218 47%. These identities are sufficient for our analysis, because we are interested in the  
219 position of mutations in the three-dimensional structure and protein structure is more  
220 conserved than protein sequence (32, 34). Crystal structure alignment of PBP3 of *E. coli* and  
221 *P. aeruginosa* confirmed this statement: the RMSD (Root Mean Square Deviation) of the  
222 alignment of all matched atoms is 1.166 Å (see **Figure 2a**), which stands for a good  
223 accordance (32). Because the *P. aeruginosa* crystal structure (PDB ID code 3PBR) contains  
224 a representation of the binding of beta-lactam meropenem and has a high resolution (1.95  
225 Å), we used this structure to model the amino acid substitutions in *H. influenzae*.

226 Interestingly, all relevant amino acids were identical between the two strains, i.e. the amino  
227 acids that we found to be directly or indirectly affected by the group-specific mutations  
228 Arg517His, Asn526Lys, and Val547Ile (**Figure S3**).

229 **Figure 2b** shows the location of the conserved catalytic domains of the beta-lactam binding  
230 site. None of the found mutations were directly located at the binding site but all substitutions  
231 of group M were distant from the beta-lactam binding site, whereas group I and II  
232 substitutions were closer to the binding site (**Figure 2c**).

233 The amino acid substitution Val547Ile were found in almost all group M strains and some  
234 group II strains (see **Table 2**). This conservative mutation has most likely no impact on  
235 protein structure: Val547 is located in a hydrophobic pocket where it is surrounded by  
236 aliphatic amino acids except for Thr532 and Thr281 (**Figure 2d**) the substitution of the  
237 aliphatic amino acid valine by the aliphatic amino acid isoleucine has most likely no influence  
238 on the protein structure.

239 The amino acid substitution Arg517His occurred in group I strains, and the substitution  
240 Asn526Lys occurred in group II strains. These substitutions are adjacent and lie in  
241 neighboring beta turns of the beta sheet that harbours the KTG motif. We speculate that  
242 Arg517 and Asn526 are part of an important Arg517-Asn526-Glu324 interaction (**Figure 2e**,  
243 left panel) for the following reasons: (a) Arg517 and Asn526 are able to build a hydrogen  
244 bond and to connect the two beta turns, thus stabilizing this important region; (b) Arg517 is  
245 able to build a hydrogen bond to Glu324, thus connecting the alpha helix that harbours the  
246 STVK motif to the beta sheet that harbors the KTG motif. In addition, the positive charge of  
247 arginine and the negative charge of glutamate attract each other. These interactions between

248 Arg517, Asn526 and Glu324 could stabilize the configuration of the two functional motifs  
249 KTG and STVK.

250 As shown in the middle panel of **Figure 2e**, the group I mutation Arg517His results in the  
251 loss of the electrostatic attraction to Glu324; His517 is able to replace Arg517 as a proton  
252 acceptor in the hydrogen bond to Asn526, and can serve as a proton donor in the hydrogen  
253 bond to Glu324. Yet, this substitution might impact the protein structure, because (a) hydrogen  
254 bonds are weaker than electrostatic interactions, and (b) histidine is less flexible than  
255 arginine, which means that the Arg517-His517-Glu324 interaction has less degrees of  
256 freedom than the Arg517-Asn526-Glu324 bridge.

257 As shown in the right panel of **Figure 2e**, the group II mutation Asn526Lys results in the loss  
258 of the hydrogen bond to Arg517. In addition, lysine is negatively charged such as arginine,  
259 which leads to an electrostatic repulsion. As a result, the two beta turns might now be  
260 repelled from each other instead of attracted.

261

## 262 **Genotypic and phenotypic detection of beta-lactamase production**

263 In 25% of the isolates tested (13/53), beta-lactamase was detected by Cefinase<sup>TM</sup> test. The  
264 same 13 strains were also found positive with TEM-1 PCR, and the remaining 40 strains  
265 were TEM-1 negative (**Table 2**).

266

## 267 **Susceptibility according to four aminopenicillin susceptibility groups**

268 Based on the MIC distributions, results of benzylpenicillin disc screen and conclusions drawn  
269 from the crystal structure binding sites, group M isolates were considered to belong either to  
270 gBLNAS or gBLPAR, while group I and II isolates were considered to belong to gBLNAR or

271 gBLPACR. The classification of the investigated strains according to beta-lactamase  
272 production and amino acid substitution groups is as follows: 36% (19/53) gBLNAS, 39%  
273 (21/53) gBLNAR, 21% (11/53) gBLPAR and 4% (2/53) gBLPACR. The results of MIC testing  
274 according to four aminopenicillin susceptibility groups is shown in **Table 4**: 81% (17/21) of  
275 gBLNAR strains were categorized as amoxicillin and amoxicillin-clavulanic acid susceptible  
276 and 9.5% (2/21) as ampicillin susceptible. With EUCAST breakpoints for *H. influenzae*  
277 infections other than meningitis, all gBLNAR strains were meropenem susceptible, while  
278 when breakpoints for meningitis were applied, 15% (3/20) were categorized as intermediate  
279 (**Table 4**). The number of gBLPACR strains in the study was only two, and therefore no  
280 reliable classification according to susceptibility phenotype could be made for this group.

281

## 282 **Discussion**

283 In recent years, alterations in PBP3 leading to decreased binding affinity of certain beta-  
284 lactam antibiotics have emerged as a prevalent resistance mechanism in *H. influenzae* (35).  
285 In this study, we investigated the mutations in the *ftsI* gene encoding for PBP3 within a  
286 collection of clinical isolates from two Swiss hospitals. To our knowledge, our study  
287 investigated for the first time the location and potential impact of the polymorphisms in the  
288 PBP3 crystal structure of clinical isolates of *H. influenzae* with a detailed description of amino  
289 acid interactions. The most frequently found group of amino acid substitutions belonged to  
290 group II (19/53; 35.8%), which was also observed in studies from other European countries  
291 (3, 14, 20, 21, 36). We could not detect strains of the group III, which harbours high-level  
292 PBP3 alterations (11, 35).

293 All wild type strains showed MICs within the susceptible range for all tested antimicrobials  
294 and were categorized as beta-lactam susceptible with benzylpenicillin disc screen, except, as  
295 anticipated, beta-lactamase producing isolates. Surprisingly, the same results were obtained  
296 for strains with amino acid substitutions of the group M (see **Figure 1**). Based on our crystal  
297 structure analysis, we suggest that the group I and group II substitutions Arg517His and  
298 Asn526Lys influence the binding of beta-lactam antimicrobials through a common mechanism  
299 by disrupting the Asn526-Arg517-Glu324 interaction (see **Figure 2e**). Since these three  
300 amino acids are able to connect the beta sheet and the alpha helix that harbour the KTG and  
301 STVK motifs, their interaction might be important for a proper binding site formation. Further  
302 molecular investigations including site-directed mutagenesis of these amino acids are clearly  
303 needed to test this hypothesis. Interestingly, a just recently published study on the crystal  
304 structure of *H. influenzae* comes to a similar conclusion that mutations Arg517His and  
305 Asn526Lys might lead to resistance through long-range structural rearrangements (37). Our  
306 study complements this finding and proposes a mechanistic explanation, i.e. the disruption of  
307 the Asn526-Arg517-Glu324 bridge.

308 Group M substitutions are distant to the binding site and shown in **Figure 4** and have  
309 probably no influence on the configuration of the binding site. We propose, that strains  
310 belonging to group M are phenotypically equal to the wild type, since an impact on the beta-  
311 lactam binding site is unlikely. This was confirmed by low MICs in antimicrobial susceptibility  
312 testing of these isolates (**Figure 1**) and categorization as beta-lactam susceptible in  
313 benzylpenicillin disc screen (**Figure S2**).

314 Investigation of group III alterations (even though not found in this study) based on PBP3  
315 structure of *P. aeruginosa* was not possible due to differences in amino acid sequences  
316 between *P. aeruginosa* and *H. influenzae* in this region.

317 Although Ellington *et al.* concluded that prediction of antimicrobial resistance based on whole  
318 genome sequencing data is currently not feasible and requires collection of extensive data  
319 sets (38), the mechanistic understanding on how single point mutations impact binding  
320 affinities of antibiotic drugs may help to predict antimicrobial resistance in the future.

321 All isolates in this study showed very low MICs to piperacillin-tazobactam (range <0.016-0.25  
322 mg/l), which was also documented in european and asian studies (14, 39). Piperacillin MICs  
323 were also very low in non-beta-lactamase-producing strains (range <0.016-0.25 mg/l), which  
324 implicates that there is no intrinsic activity of tazobactam against *Haemophilus* strains.  
325 Nevertheless, no EUCAST nor CLSI breakpoints for *H. influenzae* have been issued to date  
326 for piperacillin, and only CLSI breakpoints for piperacillin-tazobactam have been published  
327 (29).

328

329 Reliable detection of beta-lactam resistance in *H. influenzae* is essential, since beta-lactam  
330 antimicrobials represent a first line treatment for infections caused by this bacterium.

331 Detection of *H. influenzae* strains producing beta-lactamase with nitrocefin-based tests is  
332 rapid and reliable. In 34 out of 36 isolates with PBP3 alterations, EUCAST screening for  
333 beta-lactam susceptibility with benzylpenicillin disc was able to separate between PBP3  
334 alterations with no impact on the beta-lactam binding (group M) and the alterations leading to  
335 decreased affinity to beta-lactams (group I and II). All isolates containing amino acid  
336 substitutions of group M were categorized as beta-lactam susceptible (showing zone

337 diameters of 15 to 19 mm), together with wild type isolates (exception: beta-lactamase  
338 producing strains) as shown in **Figure S2**. Two isolates belonging to groups I and II were  
339 falsely categorized in screening as beta-lactam susceptible, but it needs to be mentioned that  
340 they both exhibited zone diameter on the breakpoint (12 mm), and that technical factors  
341 could be responsible for this borderline zone diameter. Further studies on larger collection of  
342 clinical isolates are needed to investigate this observation. Furthermore, our study showed  
343 that some gBLNAR strains (belonging to group I and II) are categorized as susceptible for  
344 amoxicillin, ampicillin and amoxicillin-clavulanic acid when applying EUCAST interpretation  
345 criteria (**Table 4**). Although clinical impact of these in vitro findings needs some further  
346 investigations, two pragmatic approaches were recommended by Skaare et al. (35): (a) *H.*  
347 *influenzae* isolates with altered PBP3 positive by screening for beta-lactam resistance with  
348 benzylpenicillin 1U disc should be categorized as cefuroxime resistant and always be  
349 reported as ampicillin resistant in cases of meningitis; (b) a comment should be added  
350 recommending high-dose aminopenicillin therapy or the use of other agents in severe  
351 infections caused by screening-positive isolates categorized as susceptible to  
352 aminopenicillins by disc or gradient diffusion.

353

354 Emergence of strains with resistance to carbapenems is another worrying development. The  
355 study of Cherkaoui and colleagues provides evidence that development of imipenem  
356 heteroresistance depends on a combination of altered PBP3, slowed drug influx and its  
357 enhanced efflux due to the loss of regulation of the efflux pump (33). In the present study, we  
358 found that 15% of BLNAR strains were categorized as meropenem intermediate when  
359 interpreted with EUCAST meningitis breakpoints (**Table 4**). In contrast, meropenem resistant



360 isolates were reported in the 7.4% of the gBLNAR isolates from a Portugese study (21). The  
361 same study showed that the MIC<sub>50</sub> and MIC<sub>90</sub> values of meropenem were both four times  
362 higher for gBLNAR isolates compared to gBLNAS. The same pattern was also observed for  
363 the strains of this study, but no strains with resistant phenotype were observed (**Table 4**).

364  
365 Our study has the following limitations: (a) the number of isolates examined in this study is  
366 limited, but the results are in accordance with the findings of other Swiss and European  
367 studies (3, 5, 14, 17); (b) no group III or group III-like isolates were included in the analysis,  
368 since these isolates are still rarely found in Europe (3, 14, 17); (c) besides the heterogenous  
369 impact of various alterations in PBP3 with multiple changes in amino acids also other  
370 possible resistance mechanisms like efflux pumps might further act on the MICs of  
371 antimicrobials (17, 33, 40).

372  
373 In conclusion, based on our molecular and phenotypic findings, we assume that strains  
374 belonging to M group are phenotypically equal to wild type, while amino acid substitutions of  
375 group I and group II affect the beta-lactam binding through a common mechanism by  
376 disrupting the Asn526-Arg517-Glu324 interaction. Not all PBP3 alterations have an influence  
377 on the resistant phenotype in *H. influenzae*. When EUCAST interpretation criteria were  
378 applied, some gBLNAR strains (all harbouring group I and II mutations) were categorized as  
379 susceptible to ampicillin, amoxicillin or amoxicillin-clavulanic acid.

380

## 381 **Acknowledgements**

382 We thank Helena Seth-Smith for critically reading the manuscript.

383

## 384 **Compliance with Ethical Standards**

385 **Conflict of Interest:** The authors declare that they have no conflict of interest.

386 **Ethical approval:** This article does not contain any studies with human participants or  
387 animals performed by any of the authors.

388 **Informed consent:** Not applicable (this article does not contain any studies with human  
389 participants by any of the authors).

390

## 391 **Online resources and electronic supplementary material (ESM)**

392 **ESM1:** Repository with raw data including all analysis scripts and figure-generating scripts in

393 R: <https://gitlab.com/csb.ethz/haemophilus-pbp3-manuscript>

394 **ESM2:** Supplementary figures can be found at the end of this document.

395 **Fig. S1** Determined MIC values for all isolated strains (*bla*-positive and *bla*-negative).

396 **Fig. S2** Distribution of investigated *H. influenzae* strains (n=53) according to benzylpenicillin  
397 1 U disc zone diameter (screening for beta-lactam resistance according to EUCAST).

398 **Fig. S3** Location of amino acid substitutions in the protein sequence of the reference strain  
399 *H. influenzae* RD KW20 (UniProt Entry P45059).

400 **ESM3:** Annotated sequence alignment between *H. influenzae* RD KW20 (UniProt entry  
401 P45059) and *P. aeruginosa* (UniProt entry Q51504). The file can be downloaded from the  
402 gitlab repository: <https://gitlab.com/csb.ethz/haemophilus-pbp3-manuscript>

403

404 **References**

- 405 1. Sondergaard A, Norskov-Lauritsen N. Contribution of PBP3 Substitutions and TEM-1,  
406 TEM-15, and ROB-1 Beta-Lactamases to Cefotaxime Resistance in *Haemophilus influenzae*  
407 and *Haemophilus parainfluenzae*. *Microbial drug resistance*. 2016;22(4):247-52.
- 408 2. Soyletir G, Altinkanat G, Gur D, Altun B, Tunger A, Aydemir S, et al. Results from the  
409 Survey of Antibiotic Resistance (SOAR) 2011-13 in Turkey. *J Antimicrob Chemother*.  
410 2016;71 Suppl 1:i71-83.
- 411 3. Lam TT, Claus H, Elias J, Frosch M, Vogel U. Ampicillin resistance of invasive  
412 *Haemophilus influenzae* isolates in Germany 2009-2012. *Int J Med Microbiol*.  
413 2015;305(7):748-55.
- 414 4. Angoulvant F, Cohen R, Doit C, Elbez A, Werner A, Bechet S, et al. Trends in  
415 antibiotic resistance of *Streptococcus pneumoniae* and *Haemophilus influenzae* isolated from  
416 nasopharyngeal flora in children with acute otitis media in France before and after 13 valent  
417 pneumococcal conjugate vaccine introduction. *BMC Infect Dis*. 2015;15:236.
- 418 5. Kiedrowska M, Kuch A, Zabicka D, Wasko I, Ronkiewicz P, Wasiaak K, et al. beta-  
419 Lactam resistance among *Haemophilus influenzae* isolates in Poland. *J Glob Antimicrob*  
420 *Resist*. 2017;11:161-6.
- 421 6. Zhang Y, Zhang F, Wang H, Zhao C, Wang Z, Cao B, et al. Antimicrobial  
422 susceptibility of *Streptococcus pneumoniae*, *Haemophilus influenzae* and *Moraxella*  
423 *catarrhalis* isolated from community-acquired respiratory tract infections in China: Results  
424 from the CARTIPS Antimicrobial Surveillance Program. *Journal of global antimicrobial*  
425 *resistance*. 2016;5:36-41.
- 426 7. Van PH, Binh PT, Minh NH, Morrissey I, Torumkuney D. Results from the Survey of  
427 Antibiotic Resistance (SOAR) 2009-11 in Vietnam. *The Journal of antimicrobial*  
428 *chemotherapy*. 2016;71 Suppl 1:i93-102.
- 429 8. Farrell DJ, Morrissey I, Bakker S, Buckridge S, Felmingham D. Global distribution of  
430 TEM-1 and ROB-1 beta-lactamases in *Haemophilus influenzae*. *J Antimicrob Chemother*.  
431 2005;56(4):773-6.
- 432 9. Karlowsky JA, Verma G, Zhanel GG, Hoban DJ. Presence of ROB-1  $\beta$ -lactamase  
433 correlates with cefaclor resistance among recent isolates of *Haemophilus influenzae*. *Journal*  
434 *of Antimicrobial Chemotherapy*. 2000;45(6):871-5.
- 435 10. Scriver SR, Walmsley SL, Kau CL, Hoban DJ, Brunton J, McGeer A, et al.  
436 Determination of antimicrobial susceptibilities of Canadian isolates of *Haemophilus*  
437 *influenzae* and characterization of their beta-lactamases. *Canadian Haemophilus Study*  
438 *Group. Antimicrob Agents Chemother*. 1994;38(7):1678-80.
- 439 11. Van Eldere J, Slack MP, Ladhani S, Cripps AW. Non-typeable *Haemophilus*  
440 *influenzae*, an under-recognised pathogen. *The Lancet Infectious diseases*.  
441 2014;14(12):1281-92.
- 442 12. Tristram S, Jacobs MR, Appelbaum PC. Antimicrobial resistance in *Haemophilus*  
443 *influenzae*. *Clin Microbiol Rev*. 2007;20(2):368-89.
- 444 13. Skaare D, Allum AG, Anthonisen IL, Jenkins A, Lia A, Strand L, et al. Mutant *ftsI*  
445 genes in the emergence of penicillin-binding protein-mediated beta-lactam resistance in  
446 *Haemophilus influenzae* in Norway. *Clin Microbiol Infect*. 2010;16(8):1117-24.
- 447 14. Cherkaoui A, Diene SM, Emonet S, Renzi G, Francois P, Schrenzel J. Ampicillin-  
448 resistant *Haemophilus influenzae* isolates in Geneva: serotype, antimicrobial susceptibility,  
449 and beta-lactam resistance mechanisms. *Eur J Clin Microbiol Infect Dis*. 2015;34(10):1937-  
450 45.
- 451 15. Ubukata K, Shibasaki Y, Yamamoto K, Chiba N, Hasegawa K, Takeuchi Y, et al.  
452 Association of amino acid substitutions in penicillin-binding protein 3 with beta-lactam  
453 resistance in beta-lactamase-negative ampicillin-resistant *Haemophilus influenzae*.  
454 *Antimicrob Agents Chemother*. 2001;45(6):1693-9.
- 455 16. Dabernat H, Delmas C, Seguy M, Pelissier R, Faucon G, Bennamani S, et al.  
456 Diversity of  $\beta$ -Lactam Resistance-Confering Amino Acid Substitutions in Penicillin-Binding  
457 Protein 3 of *Haemophilus influenzae*. *Antimicrobial Agents and Chemotherapy*.  
458 2002;46(7):2208-18.
- 459 17. Garcia-Cobos S, Campos J, Lazaro E, Roman F, Cercenado E, Garcia-Rey C, et al.  
460 Ampicillin-resistant non-beta-lactamase-producing *Haemophilus influenzae* in Spain: recent

- 461 emergence of clonal isolates with increased resistance to cefotaxime and cefixime.  
462 Antimicrob Agents Chemother. 2007;51(7):2564-73.
- 463 18. Kishii K, Chiba N, Morozumi M, Hamano-Hasegawa K, Kurokawa I, Masaki J, et al.  
464 Diverse mutations in the *ftsI* gene in ampicillin-resistant *Haemophilus influenzae* isolates  
465 from pediatric patients with acute otitis media. *Journal of infection and chemotherapy : official*  
466 *journal of the Japan Society of Chemotherapy*. 2010;16(2):87-93.
- 467 19. Hotomi M, Fujihara K, Billal DS, Suzuki K, Nishimura T, Baba S, et al. Genetic  
468 characteristics and clonal dissemination of beta-lactamase-negative ampicillin-resistant  
469 *Haemophilus influenzae* strains isolated from the upper respiratory tract of patients in Japan.  
470 *Antimicrob Agents Chemother*. 2007;51(11):3969-76.
- 471 20. Dabemat H, Delmas C. Epidemiology and evolution of antibiotic resistance of  
472 *Haemophilus influenzae* in children 5 years of age or less in France, 2001-2008: a  
473 retrospective database analysis. *Eur J Clin Microbiol Infect Dis*. 2012;31(10):2745-53.
- 474 21. Barbosa AR, Giufre M, Cerquetti M, Bajanca-Lavado MP. Polymorphism in *ftsI* gene  
475 and beta-lactam susceptibility in Portuguese *Haemophilus influenzae* strains: clonal  
476 dissemination of beta-lactamase-positive isolates with decreased susceptibility to  
477 amoxicillin/clavulanic acid. *J Antimicrob Chemother*. 2011;66(4):788-96.
- 478 22. Skoczynska A, Kadlubowski M, Wasko I, Fiett J, Hryniewicz W. Resistance patterns  
479 of selected respiratory tract pathogens in Poland. *Clin Microbiol Infect*. 2007;13(4):377-83.
- 480 23. Park C, Kim KH, Shin NY, Byun JH, Kwon EY, Lee JW, et al. Genetic diversity of the  
481 *ftsI* gene in beta-lactamase-nonproducing ampicillin-resistant and beta-lactamase-producing  
482 amoxicillin-/clavulanic acid-resistant nasopharyngeal *Haemophilus influenzae* strains isolated  
483 from children in South Korea. *Microb Drug Resist*. 2013;19(3):224-30.
- 484 24. Ubukata K, Chiba N, Morozumi M, Iwata S, Sunakawa K. Longitudinal surveillance of  
485 *Haemophilus influenzae* isolates from pediatric patients with meningitis throughout Japan,  
486 2000–2011. *Journal of Infection and Chemotherapy*. 2013;19(1):34-41.
- 487 25. Garcia-Cobos S, Arroyo M, Perez-Vazquez M, Aracil B, Lara N, Oteo J, et al. Isolates  
488 of beta-lactamase-negative ampicillin-resistant *Haemophilus influenzae* causing invasive  
489 infections in Spain remain susceptible to cefotaxime and imipenem. *J Antimicrob Chemother*.  
490 2014;69(1):111-6.
- 491 26. Skaare D, Anthonisen IL, Caugant DA, Jenkins A, Steinbakk M, Strand L, et al.  
492 Multilocus sequence typing and *ftsI* sequencing: a powerful tool for surveillance of penicillin-  
493 binding protein 3-mediated beta-lactam resistance in nontypeable *Haemophilus influenzae*.  
494 *BMC Microbiology*. 2014;14(1):131.
- 495 27. Zapun A, Contreras-Martel C, Vernet T. Penicillin-binding proteins and beta-lactam  
496 resistance. *FEMS microbiology reviews*. 2008;32(2):361-85.
- 497 28. The European Committee on Antimicrobial Susceptibility Testing. Breakpoint tables  
498 for interpretation of MICs and zone diameters. Version 7.1, 2017. <http://www.eucast.org>.
- 499 29. Clinical and Laboratory Standards Institute. 2017. Performance standards for  
500 antimicrobial susceptibility testing; 27th edition. CLSI document M100. Clinical and  
501 Laboratory Standards Institute W, PA., .
- 502 30. Benjamini Y, Yekutieli D. The control of the false discovery rate in multiple testing  
503 under dependency. *Ann Statist*. 2001;29(4):1165-88.
- 504 31. Cerquetti M, Giufre M, Cardines R, Mastrantonio P. First characterization of  
505 heterogeneous resistance to imipenem in invasive nontypeable *Haemophilus influenzae*  
506 isolates. *Antimicrobial agents and chemotherapy*. 2007;51(9):3155-61.
- 507 32. Gan HH, Perlow RA, Roy S, Ko J, Wu M, Huang J, et al. Analysis of protein  
508 sequence/structure similarity relationships. *Biophysical journal*. 2002;83(5):2781-91.
- 509 33. Cherkaoui A, Diene SM, Renzoni A, Emonet S, Renzi G, Francois P, et al. Imipenem  
510 heteroresistance in nontypeable *Haemophilus influenzae* is linked to a combination of altered  
511 PBP3, slow drug influx and direct efflux regulation. *Clin Microbiol Infect*. 2016.
- 512 34. Illergard K, Ardell DH, Elofsson A. Structure is three to ten times more conserved  
513 than sequence--a study of structural response in protein cores. *Proteins*. 2009;77(3):499-  
514 508.
- 515 35. Skaare D, Lia A, Hannisdal A, Tveten Y, Matuschek E, Kahlmeter G, et al.  
516 *Haemophilus influenzae* with Non-Beta-Lactamase-Mediated Beta-Lactam Resistance: Easy  
517 To Find but Hard To Categorize. *J Clin Microbiol*. 2015;53(11):3589-95.

- 518 36. Resman F, Ristovski M, Forsgren A, Kaijser B, Kronvall G, Medstrand P, et al.  
519 Increase of beta-lactam-resistant invasive *Haemophilus influenzae* in Sweden, 1997 to 2010.  
520 *Antimicrobial agents and chemotherapy*. 2012;56(8):4408-15.
- 521 37. Bellini D, Koekemoer L, Newman H, Dowson CG. Novel and Improved Crystal  
522 Structures of *H. influenzae*, *E. coli* and *P. aeruginosa* Penicillin-Binding Protein 3 (PBP3) and  
523 *N. gonorrhoeae* PBP2: Toward a Better Understanding of  $\beta$ -Lactam Target-Mediated  
524 Resistance. *Journal of Molecular Biology*. 2019;431(18):3501-19.
- 525 38. Ellington MJ, Ekelund O, Aarestrup FM, Canton R, Doumith M, Giske C, et al. The  
526 role of whole genome sequencing in antimicrobial susceptibility testing of bacteria: report  
527 from the EUCAST Subcommittee. *Clinical microbiology and infection : the official publication*  
528 *of the European Society of Clinical Microbiology and Infectious Diseases*. 2017;23(1):2-22.
- 529 39. Hirakata Y, Ohmori K, Mikuriya M, Saika T, Matsuzaki K, Hasegawa M, et al.  
530 Antimicrobial activities of piperacillin-tazobactam against *Haemophilus influenzae* isolates,  
531 including beta-lactamase-negative ampicillin-resistant and beta-lactamase-positive  
532 amoxicillin-clavulanate-resistant isolates, and mutations in their quinolone resistance-  
533 determining regions. *Antimicrob Agents Chemother*. 2009;53(10):4225-30.
- 534 40. Kaczmarek FS, Gootz TD, Dib-Hajj F, Shang W, Hallowell S, Cronan M. Genetic and  
535 molecular characterization of beta-lactamase-negative ampicillin-resistant *Haemophilus*  
536 *influenzae* with unusually high resistance to ampicillin. *Antimicrob Agents Chemother*.  
537 2004;48(5):1630-9.  
538

539 **Table 1. (a)** Categorization of *H. influenzae* strains into four aminopenicillin susceptibility  
 540 groups based on the beta-lactamase production and presence of *ftsI* mutations. **(b)** PBP3  
 541 mutation groups and corresponding key amino acid substitutions.  
 542

| (a) | Abbreviation          | Genotype                                                                                       |
|-----|-----------------------|------------------------------------------------------------------------------------------------|
|     | gBLNAS                | Beta-lactamase negative and ampicillin susceptible without resistance mechanism                |
|     | gBLNAR                | Beta-lactamase negative and ampicillin resistant with PBP3 mutations                           |
|     | gBLPAR                | Beta-lactamase positive and ampicillin resistant without PBP3 mutations                        |
|     | gBLPACR               | Beta-lactamase positive and amoxicillin-clavulanic acid resistant with PBP3 mutations          |
| (b) | PBP3 mutation group   | Key amino acid substitution                                                                    |
|     | I <sup>1</sup>        | Arg517His                                                                                      |
|     | II <sup>1</sup>       | Asn526Lys                                                                                      |
|     | IIa <sup>2</sup>      | Asn526Lys (the only substitution)                                                              |
|     | IIb <sup>2</sup>      | Asn526Lys, Ala502Val                                                                           |
|     | IIc <sup>2</sup>      | Asn526Lys, Ala502Thr                                                                           |
|     | IId <sup>2</sup>      | Asn526Lys, Ile449Val                                                                           |
|     | III <sup>1</sup>      | Met377Ile, Ser385Thr, Leu389Phe, Asn526Lys                                                     |
|     | III-like <sup>3</sup> | Group III mutations without Asn526Lys or with additional combinations at the KTG or STVK motif |
|     | M <sup>3</sup>        | Miscellaneous                                                                                  |

543

544

545

546

547

548

<sup>1</sup>According to Ubukata et al. (15)

<sup>2</sup>According to Dabernat et al. (16)

<sup>3</sup>According to Garcia-Cobos et al. (17)

549  
550

**Table 2.** Amino acid substitutions in the transpeptidase domain of the *ftsI* gene found in the strains of this study (n=53).

| Group     | ID <sup>e</sup> | No. of strains           |                          | Amino acid substitutions     |         |                             |         |                             |         |         |         |         |         |         |     |     |
|-----------|-----------------|--------------------------|--------------------------|------------------------------|---------|-----------------------------|---------|-----------------------------|---------|---------|---------|---------|---------|---------|-----|-----|
|           |                 | <i>bla</i> <sup>-b</sup> | <i>bla</i> <sup>+b</sup> | Near STVK motif <sup>a</sup> |         | Near SSN motif <sup>a</sup> |         | Near KTG motif <sup>a</sup> |         |         |         |         |         |         |     |     |
|           |                 | Ala-294 <sup>c</sup>     | Lys-310                  | Asp-350                      | Met-377 | Ile-449                     | Gly-490 | Ala-502                     | Arg-517 | Asn-526 | Ala-530 | Val-547 | Val-562 | Asn-569 |     |     |
| Wild type | A               | 11                       | 6                        |                              |         |                             |         |                             |         |         |         |         |         |         |     |     |
| I         | B               | 1                        |                          |                              |         |                             |         |                             |         | Val     | His     |         |         |         |     |     |
|           | C               | 1                        |                          |                              |         |                             |         |                             |         |         | His     |         |         |         |     |     |
| IIa       | D               | 4                        | 1                        |                              |         | Asn                         |         |                             | Glu     |         |         | Lys     | Ser     |         |     |     |
|           | E               | 1                        |                          |                              |         | Asn                         |         |                             |         |         |         | Lys     |         |         | Leu |     |
|           | F               | 1                        |                          |                              |         |                             |         |                             |         |         |         | Lys     | Ser     | Ile     |     |     |
| IIb       | G               | 2                        |                          |                              |         | Asn                         | Ile     |                             | Glu     | Val     |         | Lys     |         | Ile     |     | Ser |
|           | H               | 1                        | 1                        |                              |         | Asn                         | Ile     |                             |         | Val     |         | Lys     |         | Ile     |     | Ser |
|           | I               | 2                        |                          |                              |         |                             |         |                             |         | Val     |         | Lys     |         |         |     |     |
| IIc       | J               | 6                        |                          |                              |         |                             |         | Val                         |         |         |         | Lys     |         | Ile     |     | Ser |
|           | K               | 2                        |                          |                              |         |                             | Ile     | Val                         |         |         |         | Lys     |         | Ile     |     | Ser |
| M         | L               |                          | 2                        |                              |         | Asn                         |         |                             |         |         |         |         |         | Ile     |     |     |
|           | M               |                          | 2 <sup>d</sup>           |                              | Glu     |                             |         |                             |         |         |         |         |         | Ile     |     |     |

|   |                |                |  |     |     |  |  |  |  |  |  |  |  |     |  |     |
|---|----------------|----------------|--|-----|-----|--|--|--|--|--|--|--|--|-----|--|-----|
| N | 5              |                |  |     |     |  |  |  |  |  |  |  |  | Ile |  |     |
| O | 1 <sup>d</sup> |                |  |     | Asn |  |  |  |  |  |  |  |  | Ile |  | Ser |
| P | 1 <sup>d</sup> |                |  |     |     |  |  |  |  |  |  |  |  | Ile |  | Ser |
| Q | 1 <sup>d</sup> | 1 <sup>d</sup> |  | Ser |     |  |  |  |  |  |  |  |  |     |  |     |

551

552

553

554

555

556

557

558

559

560

561

562

563

564

565

566

567

568

569

570

571

572

573

574

575

576

577

578

<sup>a</sup> The conserved catalytic motifs are encoded in the transpeptidase amino acid sequence as follows: STVK 327-330 amino acid, SSN 379-381 amino acid, KTG 512-514 amino acid.

<sup>b</sup> bla-: beta-lactamase negative (TEM-1 negative); bla+: beta-lactamase positive (TEM-1 positive).

<sup>c</sup> Amino acid substitution described for the first time in this study.

<sup>d</sup> Amino acid substitution combinations described for the first time in strains of this study.

<sup>e</sup> ID according to the amino acid substitution



579  
580  
581

**Table 3.** Results of minimal inhibitory concentration (MIC) testing according to amino acid substitution groups.

| Group     | ID <sup>g</sup> | No. of isolates           |                           | Ampicillin | Amoxicillin | Amoxicillin-clavulanic acid | Piperacillin      | Piperacillin-tazobactam | Cefuroxime (iv <sup>c</sup> ) | Meropenem (infections other than meningitis) | Meropenem (meningitis) |
|-----------|-----------------|---------------------------|---------------------------|------------|-------------|-----------------------------|-------------------|-------------------------|-------------------------------|----------------------------------------------|------------------------|
|           |                 | <i>bla</i> - <sup>b</sup> | <i>bla</i> + <sup>b</sup> |            |             |                             |                   |                         |                               |                                              |                        |
| Wild type | A               |                           | 6                         | 4->256     | 3->256      | 0.38-1.5                    | 2-24              | 0.016- 0.064            | 0.38-1                        | 0.032-0.064                                  | 0.032-0.064            |
|           | A               | 11                        |                           | 0.25-0.5   | 0.25-0.75   | 0.19-0.75                   | <0.016-0.032      | <0.016-0.064            | 0.19-1                        | 0.016-0.064                                  | 0.016-0.064            |
| I         | B               | 1                         |                           | 1.5        | 1.5         | 1.5                         | 0.032             | 0.023                   | 2                             | 0.064                                        | 0.064                  |
|           | C               | 1                         |                           | 0.75       | 1           | 0.75                        | 0.064             | 0.047                   | 1.5                           | 0.064                                        | 0.064                  |
| IIa       | D               |                           | 1                         | >256       | >256        | 1                           | 8                 | 0.064                   | 2                             | 0.19                                         | 0.19                   |
|           | D               | 4 <sup>e</sup>            |                           | 1- 2       | 0.75-1.5    | 0.75-1.5                    | 0.032-0.094       | 0.016-0.064             | 1.5-2                         | 0.125-0.38                                   | 0.125 -0.38            |
|           | E               | 1                         |                           | 3          | 4           | 4                           | 0.064             | 0.032                   | 12                            | 0.38                                         | 0.38                   |
|           | F               | 1                         |                           | 1.5        | 1           | 1                           | n.d. <sup>d</sup> | 0.047                   | 1.5                           | n.d. <sup>d</sup>                            | n.d. <sup>d</sup>      |
| IIb       | G               | 2                         |                           | 1-2        | 1- 3        | 1- 3                        | 0.016-0.094       | 0.016-0.064             | 4-16                          | 0.094-0.25                                   | 0.094-0.25             |
|           | H               |                           | 1                         | >256       | >256        | 3                           | >256              | 0.25                    | 16                            | 0.094                                        | 0.094                  |
|           | H               | 1                         |                           | 3          | 2           | 2                           | 0.125             | 0.19                    | 12                            | 0.094                                        | 0.094                  |
|           | I               | 2                         |                           | 1.5-2      | 1.5- 3      | 1.5- 3                      | 0.032-0.047       | 0.032-0.064             | 2- 4                          | 0.094-0.25                                   | 0.094-0.25             |
| II d      | J               | 6 <sup>f</sup>            |                           | 1.5-2      | 1.5-2       | 1.5-2                       | 0.032-0.25        | <0.016-0.125            | 2- 6                          | 0.094-0.19                                   | 0.094-0.19             |
|           | K               | 2                         |                           | 2-3        | 2- 4        | 2- 3                        | 0.064-0.094       | 0.064                   | 6                             | 0.19-0.38                                    | 0.19 -0.38             |

|   |   |   |   |          |           |           |             |              |      |             |             |
|---|---|---|---|----------|-----------|-----------|-------------|--------------|------|-------------|-------------|
| M | L |   | 2 | >256     | >256      | 1.-1.5    | 2-8         | <0.016-0.016 | 1    | 0.094-0.125 | 0.094-0.125 |
|   | M |   | 2 | >256     | >256      | 1         | 8-64        | 0.016-0.023  | 0.75 | 0.064       | 0.064       |
|   | N | 5 |   | 0.38-0.5 | 0.25-0.75 | 0.38-0.75 | 0.016-0.047 | <0.016-0.032 | 0.75 | 0.032-0.094 | 0.047-0.094 |
|   | O | 1 |   | 0.75     | 0.75      | 0.75      | 0.023       | 0.016        | 0.75 | 0.064       | 0.064       |
|   | P | 1 |   | 0.5      | 0.75      | 0.75      | 0.023       | 0.016        | 0.75 | 0.064       | 0.064       |
|   | Q |   | 1 | >256     | >256      | 1         | 32          | 0.023        | 0.75 | 0.047       | 0.047       |
|   | Q | 1 |   | 0.38     | 0.38      | 0.5       | 0.016       | <0.016       | 0.75 | 0.047       | 0.047       |

582

583

584 <sup>a</sup> green: susceptible; yellow: intermediate; red: resistant.

585 <sup>b</sup> bla-: beta-lactamase negative; bla+: beta-lactamase positive.

586 <sup>c</sup> iv: refers to intravenous administration of cefuroxime;

587 <sup>d</sup> n.d.: not done.

588 <sup>e</sup> ampicillin: one isolate susceptible, three isolates resistant; meropenem: one isolate intermediate, three isolates susceptible

589 <sup>f</sup> cefuroxime (i/v): four isolates intermediate, two isolates resistant

590 <sup>g</sup> ID according to the amino acid substitution

591

592

593

594

595

596

597  
598**Table 4.** Results of MIC testing according to four aminopenicillin susceptibility groups (gBLNAS n=19, gBLNAR n=21, gBLPAR n=11, gBLPACR n=2).

| Antimicrobial               | Genotypic category | MIC (mg/l)        |                   |              | Susceptibility category (%) |   |      |
|-----------------------------|--------------------|-------------------|-------------------|--------------|-----------------------------|---|------|
|                             |                    | MIC <sub>50</sub> | MIC <sub>90</sub> | MIC range    | S                           | I | R    |
| Ampicillin                  | gBLNAS             | 0.38              | 0.5               | 0.19-0.75    | 100                         | 0 | 0    |
|                             | gBLNAR             | 1.5               | 3                 | 0.75-3       | 9.5                         | 0 | 90.5 |
|                             | gBLPAR             | >256              | >256              | 4->256       | 0                           | 0 | 100  |
|                             | gBLPACR            | n.a. <sup>a</sup> | n.a. <sup>a</sup> | >256         | 0                           | 0 | 100  |
| Amoxicillin                 | gBLNAS             | 0.5               | 0.75              | 0.25-0.75    | 100                         | 0 | 0    |
|                             | gBLNAR             | 1.5               | 3                 | 0.75-4       | 81                          | 0 | 19   |
|                             | gBLPAR             | >256              | 256               | 3->256       | 0                           | 0 | 100  |
|                             | gBLPACR            | n.a. <sup>a</sup> | n.a. <sup>a</sup> | >256         | 0                           | 0 | 100  |
| Amoxicillin-clavulanic acid | gBLNAS             | 0.5               | 0.75              | 0.19-0.75    | 100                         | 0 | 0    |
|                             | gBLNAR             | 1.5               | 3                 | 0.75-4       | 81                          | 0 | 19   |
|                             | gBLPAR             | 1                 | 1                 | 0.38-1.5     | 100                         | 0 | 0    |
|                             | gBLPACR            | n.a. <sup>a</sup> | n.a. <sup>a</sup> | 1-3          | 50                          | 0 | 50   |
| Piperacillin <sup>d</sup>   | gBLNAS             | 0.016             | 0.023             | <0.016-0.047 | 100                         | 0 | 0    |
|                             | gBLNAR             | 0.047             | 0.094             | 0.016-0.25   | 100                         | 0 | 0    |
|                             | gBLPAR             | 8                 | 32                | 2-64         | 0                           | 0 | 100  |
|                             | gBLPACR            | n.a. <sup>a</sup> | n.a. <sup>a</sup> | 8->256       | 0                           | 0 | 100  |
| Piperacillin-tazobactam     | gBLNAS             | <0.016            | 0.032             | <0.016-0.064 | 100                         | 0 | 0    |
|                             | gBLNAR             | 0.047             | 0.125             | <0.016-0.19  | 100                         | 0 | 0    |

|                                                                   |         |                   |                   |              |           |        |       |
|-------------------------------------------------------------------|---------|-------------------|-------------------|--------------|-----------|--------|-------|
|                                                                   | gBLPAR  | 0.023             | 0.047             | <0.016-0.064 | 100       | 0      | 0     |
|                                                                   | gBLPACR | n.a. <sup>a</sup> | n.a. <sup>a</sup> | 0.064-0.25   | 100       | 0      | 0     |
| Cefuroxime (iv <sup>c</sup> )                                     | gBLNAS  | 0.75              | 0.75              | 0.25-1       | 100       | 0      | 0     |
|                                                                   | gBLNAR  | 2                 | 12                | 1.5-16       | 0         | 57     | 43    |
|                                                                   | gBLPAR  | 0.75              | 1                 | 0.38-1       | 100       | 0      | 0     |
|                                                                   | gBLPACR | n.a. <sup>a</sup> | n.a. <sup>a</sup> | 2-16         | 0         | 0      | 0     |
| Meropenem<br>(meningitis/<br>infections other than<br>meningitis) | gBLNAS  | 0.047             | 0.064             | 0.016-0.094  | 100 / 100 | 0 / 0  | 0 / 0 |
|                                                                   | gBLNAR  | 0.125             | 0.38              | 0.016-0.19   | 85 / 100  | 15 / 0 | 0 / 0 |
|                                                                   | gBLPAR  | 0.064             | 0.094             | 0.032-0.125  | 100 / 100 | 0 / 0  | 0 / 0 |
|                                                                   | gBLPACR | n.a. <sup>a</sup> | n.a. <sup>a</sup> | 0.064-0.25   | 100 / 100 | 0 / 0  | 0 / 0 |

599  
600  
601  
602  
603  
604

<sup>a</sup> n.a.: not applicable because only two strains tested.

<sup>b</sup> One BLNAR strain was not tested for piperacillin and meropenem.

<sup>c</sup> iv: refers to intravenous administration of cefuroxime.

### MIC values of bla-negative strains by PBP3 amino acid substitution group

... MIC breakpoint / lower limit of intermediary region

Adj. p-values from Wilcoxon rank-sum test

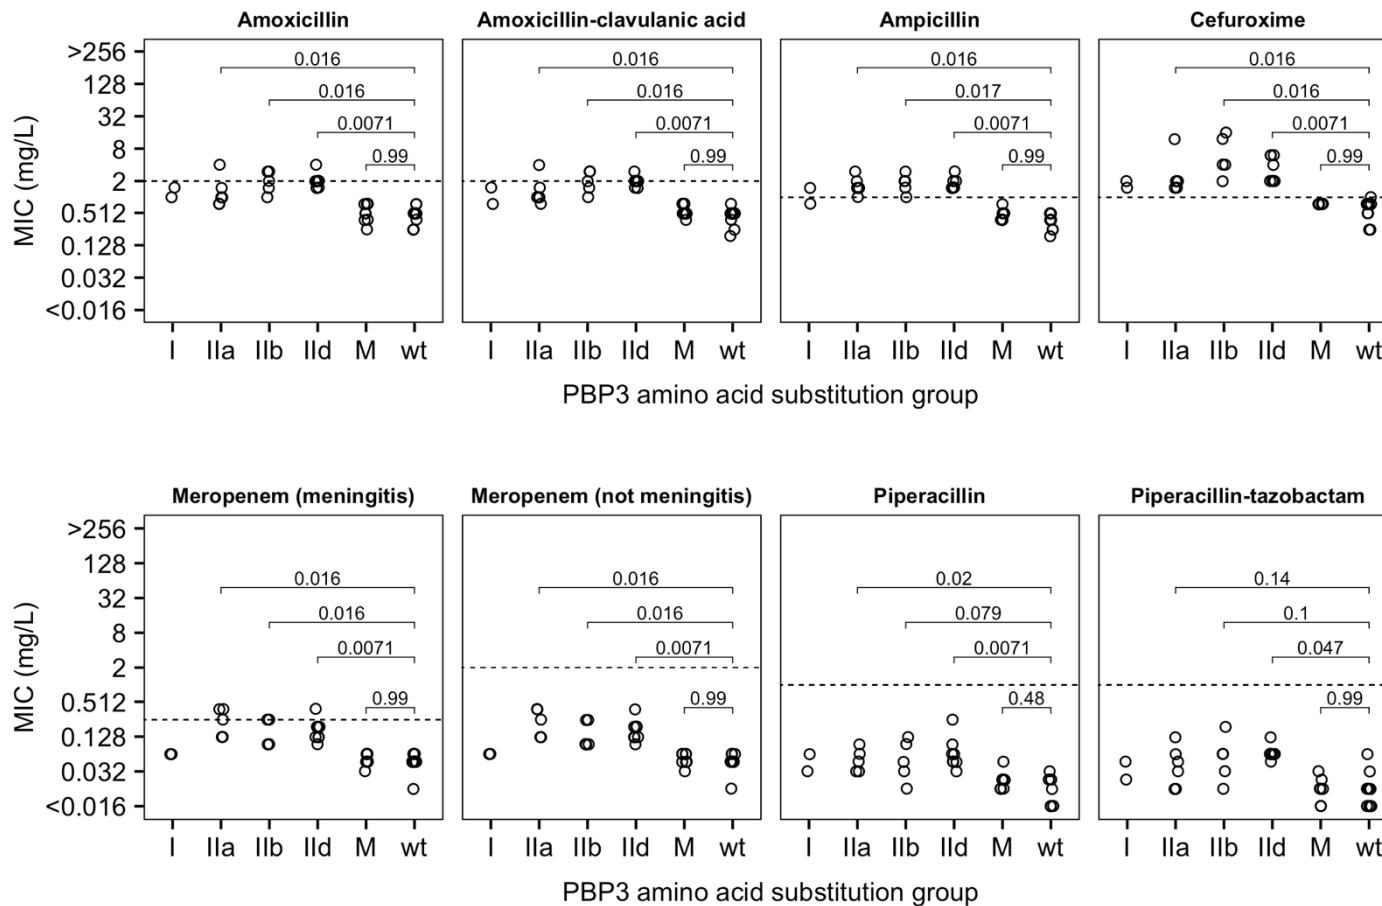

**Fig. 1** MIC values of beta-lactamase negative strains. Wilcoxon rank-sum test was used to compare MIC values of strains with amino acid substitutions to the wildtype. The numbers show the adjusted p-values (Benjamini-Hochberg-Yekutieli correction). The dotted line indicates the MIC breakpoint or, if applicable, the lower limit of the intermediary region. All antibiotic breakpoints are as defined by EUCAST with the exception of piperacillin and piperacillin-tazobactam which are according to CLSI.

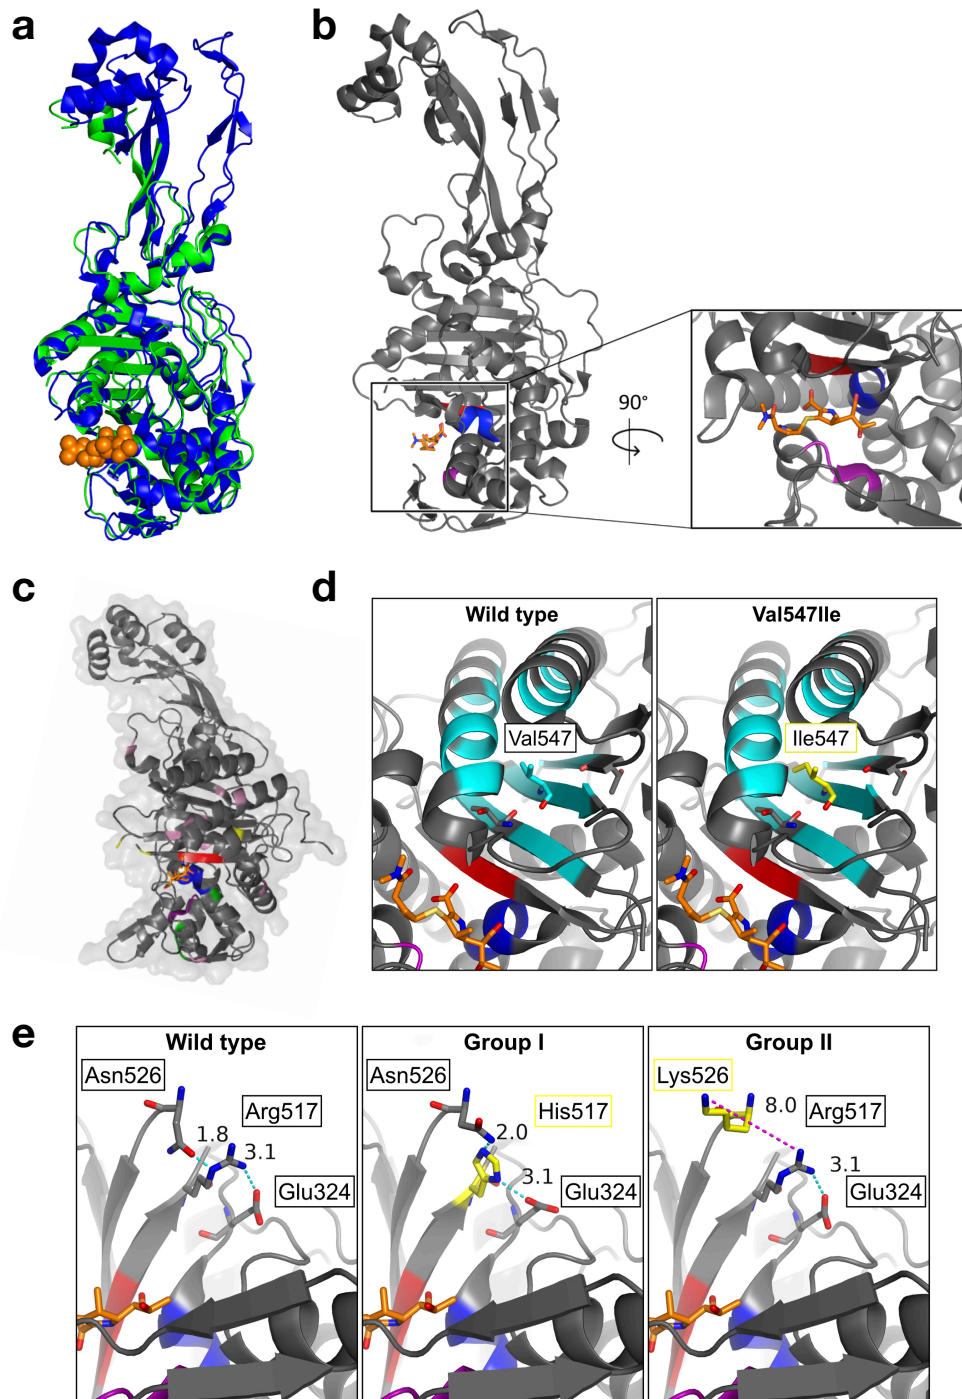

**Fig. 2** PBP3 crystal structure analysis. **(a)** Crystal structure alignment of PBP3 of *Escherichia coli* (green, PDB ID 4BJP, solved at 2.50 Å) and of *Pseudomonas aeruginosa* (blue, PDB ID 3PBR, solved at 1.97 Å). The meropenem molecule is shown in orange. The root mean square deviation of all matched atoms (2185 atoms) is 1.166 Å. **(b)** PBP3 crystal structure of *P. aeruginosa* with a molecule of meropenem (orange) bound at the active site. The transpeptidase domain belongs to the active C-terminus. The three catalytic domains are highlighted in blue (SXXK), purple ((S/Y)XN) and red ((K/H)(S/T)G motif). **(c)** Localization of amino acid substitutions of PBP3 groups in the PBP3 crystal structure of *P. aeruginosa* (PDB ID 3PBR): group I and II are highlighted in yellow, group III in green and group M in pink. The three catalytic domains are highlighted in blue (SXXK), purple ((S/Y)XN) and red ((K/H)(S/T)G motif). The meropenem molecule is shown in orange. **(d)** Graphic representation of the most common group M mutation Val547Ile (shown in yellow) in the PBP3 crystal structure of *P. aeruginosa* (PDB ID 3PBR). Val547 lies in a hydrophobic pocket where it is surrounded by aliphatic amino acids (shown in cyan), except for Thr532 and Thr281, which are polar. The substitution of an aliphatic amino acid by another aliphatic amino acid (valine to isoleucine) has most likely no impact on the protein structure. The three catalytic domains are highlighted in blue (SXXK), purple ((S/Y)XN) and red ((K/H)(S/T)G motif). The meropenem molecule is shown in orange. **(e)** Investigation of the group I mutation Arg517His and group II mutation Asn526Lys (both shown in yellow) based on the PBP3 structure of *P. aeruginosa* (PDB ID 3PBR). Attracting interactions are shown in cyan (i.e. hydrogen bonds and electrostatic attraction between Arg-Glu), repelling interactions in pink (electrostatic repulsion between Lys-Arg). Numbers indicate the distance between atoms in Ångström. Both mutations are able to disrupt the Arg517-His517-Glu324 interaction. The three catalytic domains are highlighted in blue (SXXK), purple ((S/Y)XN) and red ((K/H)(S/T)G motif). The meropenem molecule is shown in orange.

## Supplementary Material

of the manuscript

### **Impact of different amino acid substitutions in penicillin-binding protein 3 on beta-lactam susceptibility in *Haemophilus influenzae***

Josiane Reist<sup>1, 2†</sup>, Janina Linnik<sup>3, 4†</sup>, Urs Schibli<sup>5</sup>, Adrian Egli<sup>1, 2 ††</sup> and Vladimira Hinić<sup>1 †† \*</sup>

<sup>1</sup> Division of Clinical Bacteriology and Mycology, University Hospital Basel, Basel, Switzerland

<sup>2</sup> Department of Biomedicine, University of Basel, Basel, Switzerland

<sup>3</sup> Department of Biosystems Science and Engineering, ETH Zurich, Basel, Switzerland

<sup>4</sup> Swiss Institute for Bioinformatics, Basel, Switzerland

<sup>5</sup> Bakteriologisches Institut Olten, Kantonsspital Olten, Switzerland

† These first authors contributed equally to this article.

†† These senior authors contributed equally to this article.

\*Corresponding author

Division of Clinical Microbiology

University Hospital Basel

Petersgraben 4

4031 Basel, Switzerland

Phone: +41 61 2655805

Fax: +41 61 265 53 55

E-mail: vladimira.hinic@usb.ch

### MIC values of all isolated strains by PBP3 amino acid substitution group

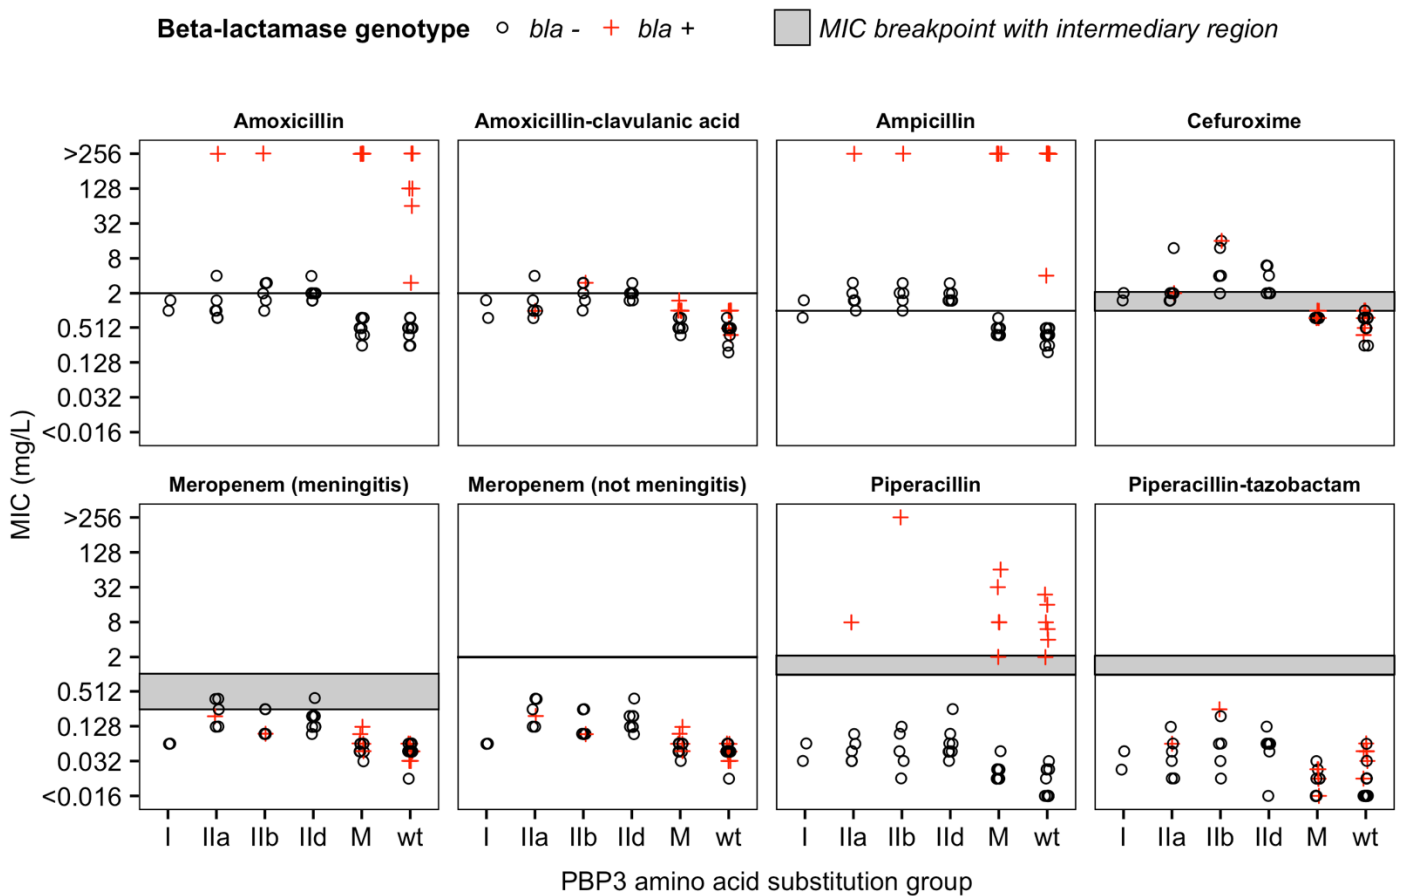

**Fig. S1** Minimal inhibitory concentrations (MIC) of all isolated strains for tested antibiotics (amoxicillin, amoxicillin-clavulanic acid, ampicillin, cefuroxime, meropenem (meningitis), meropenem (not meningitis), piperacillin, piperacillin-tazobactam). The horizontal line indicates the MIC breakpoint and, if applicable, the grey region indicates the intermediary region. All antibiotic breakpoints are according to EUCAST with the exception of piperacillin and piperacillin-tazobactam which are according to CLSI.



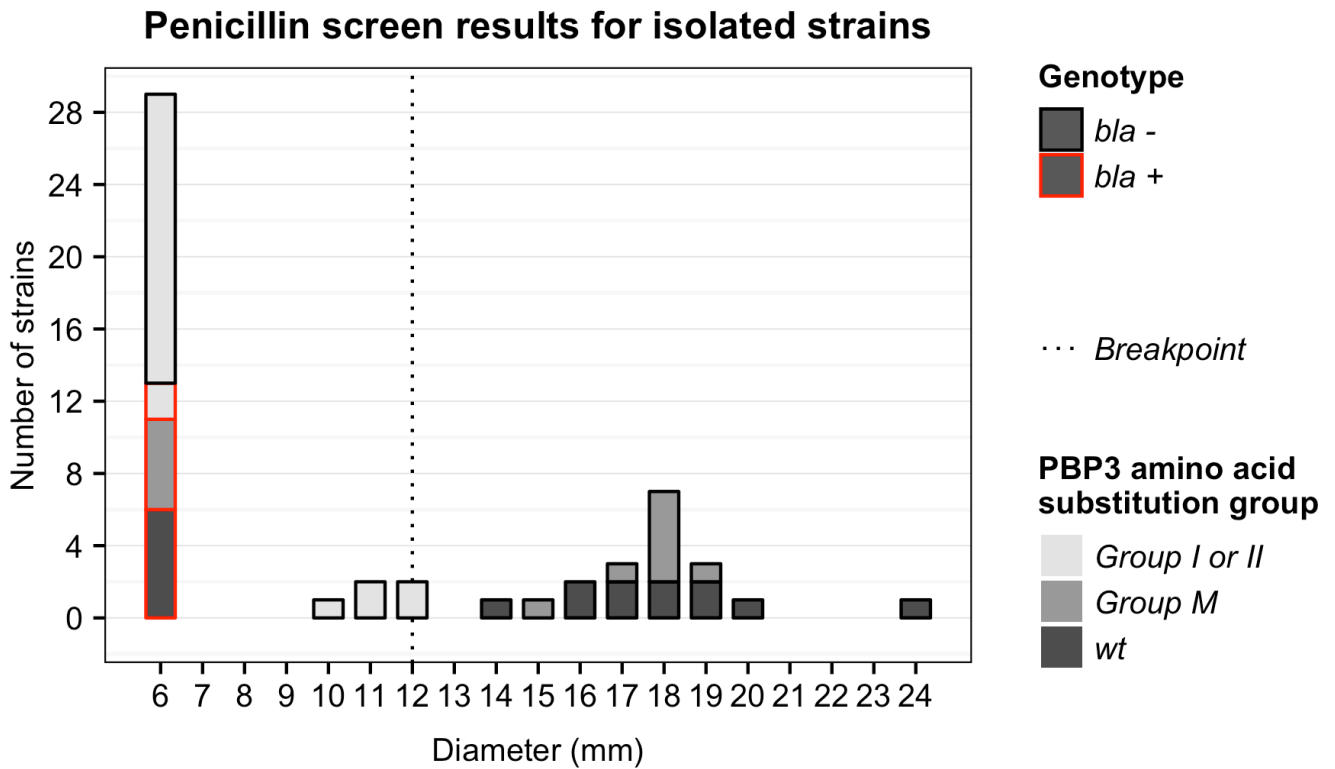

**Fig. S2** Distribution of investigated *H. influenzae* strains (n=53) according to benzylpenicillin 1 U disc zone diameter (screening for beta-lactam resistance according to EUCAST). Wildtype: n=17; group M: n=13; group I and II: n=23; beta-lactamase positive isolates (red border): n=13. The dotted line indicates the diameter breakpoint (resistant  $\leq 11$  mm, susceptible  $\geq 12$  mm).

|             |            |             |             |            |
|-------------|------------|-------------|-------------|------------|
| 10          | 20         | 30          | 40          | 50         |
| MVKFNSSRKS  | GKSKKTIRKL | TAPETVKQNK  | PQKVFKECFM  | RGRYMLSTVL |
| 60          | 70         | 80          | 90          | 100        |
| ILLGLCALVA  | RAAYVQSINA | DTLSNEADKR  | SLRKDEVLSV  | RGSILDRNGQ |
| 110         | 120        | 130         | 140         | 150        |
| LLSVSVPMISA | IVADPKTMLK | ENSLADKERI  | AALAEELGMT  | ENDLVKKIEK |
| 160         | 170        | 180         | 190         | 200        |
| NSKSGYLYLA  | RQVELSKANY | IRRLKIKGII  | LETEHRRFYP  | RVEEAAHVVG |
| 210         | 220        | 230         | 240         | 250        |
| YTDIDGNIE   | GIEKSFNSLL | VGKDGSRVTR  | KDKRGNIVAH  | ISDEKKYDAQ |
| 260         | 270        | 280         | 290         | 300        |
| DVTLSIDEKL  | QSMVYREIKK | AVSENNAESG  | TAVLVDVVRTG | EVLAMATAPS |
| 310         | 320        | 330         | 340         | 350        |
| YNPNRNVGK   | SELMRNRAIT | DTFEPGSTVK  | PFVVLTAQR   | GVVVRDEIID |
| 360         | 370        | 380         | 390         | 400        |
| TTSFKLSGKE  | IVDVAPRAQQ | TLDEILMNSS  | NRGVSRLALR  | MPPSALMETY |
| 410         | 420        | 430         | 440         | 450        |
| QNAGLSKPTD  | LGLIGEQVGI | LNANRKRWAD  | IERATVAYGY  | GITATPLQIA |
| 460         | 470        | 480         | 490         | 500        |
| RAYATLGSGF  | VYRPLSITKV | DPPVIGKRVF  | SEKITKDIVG  | ILEKVAIKNK |
| 510         | 520        | 530         | 540         | 550        |
| RAMVEGYRVG  | VKTGTARKIE | NGHYVKNKYVA | FTAGIAPISD  | PRYALVVLIN |
| 560         | 570        | 580         | 590         | 600        |
| DPKAGEYYGG  | AVSAPVFSNI | MGYALRANAI  | PQDAEAAENT  | TTKSAKRIVY |
| 610         |            |             |             |            |
| IGEHNQKVN   |            |             |             |            |

**Fig. S3** Protein sequence of the reference strain *H. influenzae* RD KW20 (UniProt Entry P45059). The group-specific amino acid substitutions Arg517His, Asn526Lys and Val547Ile are shown in green and their suggested interaction partners Arg517 and Glu324 are highlighted in yellow. The three motifs that define that active site of the serine penicillin-recognizing enzyme family are shown in blue, purple and red. The amino acid substitution Arg517His were found in all group I strains and might lead to a loss of an electrostatic interaction to Glu324. Substitution Asn526Lys were found in all group II strains and might lead to a loss of a hydrogen bond to Arg517. Substitution Val547Ile were found in all group M and in some group II strains and has most likely no impact on the protein structure. For more information on the identified mutations, see **Table 1**. For a representation of the mutations in the three-dimensional protein structure, see **Figures 4-6**. Amino acids in grey belong to a beta-loop that is not represented in the crystal structure that was used for structure analysis (PDB ID 3PBR).
